# Supplementary material
Source: publisher figshare collection journal article supplement (https://rs.figshare.com/ndownloader/files/12818453)
Supplement: Supplementary file 1 [file 12818453]

## Sheet: Sheet2
clade	genus	species	family	status	distribution	max_length	B_species	Bs_min_temp	Bs_max_temp	Bs_no_constant	Bs_no_temp
bivalvia	Abra	aequalis	Semelidae	extant	narrow	8.037	6.28595e-05	6.99589e-05	0.000163484	4.48996e-16	1.40815e+07
bivalvia	Acrosterigma	dalli	Cardiidae	extinct	broad	107.288	0.0338564	0.0387835	0.0809183	2.41831e-13	4.35234e+09
bivalvia	Agnocardia	spinosifrons	Cardiidae	extinct	narrow	53.542	0.00660934	0.00815927	0.0161545	4.72096e-14	9.35114e+08
bivalvia	Amusium	mortoni	Pectinidae	extinct	narrow	149.114	0.0651284	0.0746066	0.15566	5.00988e-13	8.37246e+09
bivalvia	Anadara	aequalitas	Arcidae	extinct	narrow	37.1365	0.0019537	0.00250403	0.00612862	1.50284e-14	3.86538e+08
bivalvia	Anadara	alumensis	Arcidae	extinct	narrow	38.414	0.00206554	0.00291287	0.00741797	1.58888e-14	4.22803e+08
bivalvia	Anadara	aresta	Arcidae	extinct	narrow	35.681	0.00172826	0.00243723	0.0062067	1.32943e-14	3.53764e+08
bivalvia	Anadara	callicestosa	Arcidae	extinct	narrow	34.69	0.00258561	0.0029619	0.00617973	1.98893e-14	3.32388e+08
bivalvia	Anadara	campsa	Arcidae	extinct	narrow	39.725	0.00219164	0.00309068	0.0078708	1.68587e-14	4.48613e+08
bivalvia	Anadara	catasarca	Arcidae	extinct	narrow	37.982	0.00205427	0.00263293	0.00644411	1.58021e-14	4.06436e+08
bivalvia	Anadara	hoerleae	Arcidae	extinct	narrow	64.539	0.0102116	0.0116977	0.0244061	7.85506e-14	1.31273e+09
bivalvia	Anadara	idonea	Arcidae	extinct	broad	38.763	0.00210403	0.00296714	0.00755618	1.61848e-14	4.30681e+08
bivalvia	Anadara	lienosa	Arcidae	extinct	narrow	54.084	0.00433765	0.00611703	0.0155778	3.33665e-14	8.87888e+08
bivalvia	Anadara	notoflorida	Arcidae	extinct	broad	46.495	0.00494308	0.00566245	0.0118142	3.80237e-14	6.35447e+08
bivalvia	Anadara	propearesta	Arcidae	extinct	narrow	41.8595	0.00247728	0.0034935	0.00889662	1.9056e-14	5.07082e+08
bivalvia	Angulus	versicolor	Tellinidae	extant	narrow	13.5	0.0001964	0.000331617	0.000682714	1.40286e-15	4.43599e+07
bivalvia	Anodontia	alba	Lucinidae	extant	broad	42.497	0.00198229	0.00417969	0.00757925	1.41592e-14	5.64424e+08
bivalvia	Anodontia	schrammi	Lucinidae	extant	broad	78.5	0.00284189	0.0239894	0.0308573	2.02992e-14	2.18035e+09
bivalvia	Anomalocardia	cuneimeris	Tellinidae	extant	narrow	15.3895	0.000221826	0.000359488	0.000772373	1.58447e-15	5.92739e+07
bivalvia	Anomia	simplex	Anomiidae	extant	broad	18.2	0.000212024	0.000417186	0.00103683	1.63095e-15	7.97722e+07
bivalvia	Antillipecten	antillarum	Pectinidae	extant	narrow	19.492	0.000308666	0.000816407	0.00140674	2.37435e-15	9.5413e+07
bivalvia	Arca	wagneriana	Arcidae	extinct	broad	97.4143	0.0247624	0.0300439	0.0602043	1.9048e-13	3.42711e+09
bivalvia	Arca	zebra	Arcidae	extant	narrow	65.83	0.00437346	0.0126589	0.0210692	3.3642e-14	1.44097e+09
bivalvia	Arcinella	cornuta	Chamidae	extant	narrow	48.437	0.0051639	0.00588483	0.0125397	3.6885e-14	7.53387e+08
bivalvia	Arcopagia	fausta	Tellinidae	extant	broad	59.4198	0.00379089	0.0117794	0.0183171	2.70778e-14	1.19657e+09
bivalvia	Argopecten	comparilis	Pectinidae	extinct	narrow	62.748	0.0087182	0.0107627	0.0213089	6.70631e-14	1.23348e+09
bivalvia	Armimiltha	disciformis	Lucinidae	extinct	broad	76.2516	0.0144053	0.0172626	0.0360487	1.02895e-13	2.04864e+09
bivalvia	Astarte	concentrica	Astartidae	extinct	narrow	31.719	0.000872938	0.00135874	0.00395252	6.23527e-15	2.93628e+08
bivalvia	Atrina	harrisii	Pinnidae	extinct	narrow	98.2345	0.0262205	0.0300364	0.0626683	2.01696e-13	3.37073e+09
bivalvia	Atrina	rigida	Pinnidae	extant	narrow	164.239	0.0220417	0.0523132	0.138375	1.69552e-13	1.03678e+10
bivalvia	Barbatia	caloosahatchiensis	Arcidae	extinct	narrow	46.731	0.00499876	0.00572623	0.0119473	3.8452e-14	6.42606e+08
bivalvia	Barbatia	candida	Arcidae	extant	narrow	38.751	0.00180693	0.00326085	0.00665287	1.38995e-14	4.34622e+08
bivalvia	Barbatia	domingensis	Arcidae	extant	narrow	23.4423	0.000725106	0.00119564	0.00255208	5.57774e-15	1.65195e+08
bivalvia	Barbatia	irregularis	Arcidae	extinct	broad	27.556	0.00141161	0.00174264	0.00345025	1.08586e-14	1.9972e+08
bivalvia	Botula	fusca	Mytilidae	extant	narrow	22.38	0.000165463	0.00135527	0.00171029	1.27279e-15	1.2604e+08
bivalvia	Brachidontes	exustus	Mytilidae	extant	narrow	14.307	0.000209083	0.000232697	0.00054378	1.60833e-15	4.68376e+07
bivalvia	Callucina	keenae	Lucinidae	extant	broad	11.8945	0.000261373	0.000314396	0.000643942	1.86695e-15	3.71907e+07
bivalvia	Cardita	olga	Carditidae	extinct	broad	45.1885	0.00476479	0.00566521	0.011514	3.40342e-14	6.42611e+08
bivalvia	Carditamera	arata	Carditidae	extinct	broad	36.812	0.00288525	0.00354303	0.00797551	2.0609e-14	4.39339e+08
bivalvia	Carditamera	dasytes	Carditidae	extinct	broad	47.202	0.00550406	0.00630507	0.013155	3.93147e-14	7.07564e+08
bivalvia	Carditamera	floridana	Carditidae	extant	broad	13.497	0.000117845	0.000231876	0.000576282	8.4175e-16	4.43382e+07
bivalvia	Carditamera	tamiamiensis	Carditidae	extinct	broad	79.366	0.0173775	0.0199064	0.041533	1.24125e-13	2.23393e+09
bivalvia	Carolinapecten	eboreus	Pectinidae	extinct	narrow	108.825	0.0324432	0.0371646	0.0775407	2.49563e-13	4.17067e+09
bivalvia	Cavilinga	blanda	Lucinidae	extant	broad	4.346	1.74608e-05	2.49469e-05	4.72036e-05	1.2472e-16	3.61328e+06
bivalvia	Chama	corticosa	Chamidae	extinct	narrow	47.192	0.00499868	0.0061709	0.0122177	3.57049e-14	7.07232e+08
bivalvia	Chama	emmonsi	Chamidae	extinct	narrow	26.2875	0.00095296	0.00134388	0.00342236	6.80685e-15	1.95065e+08
bivalvia	Chama	heilprini	Chamidae	extinct	narrow	67.742	0.00922097	0.0139085	0.0280856	6.5864e-14	1.57363e+09
bivalvia	Chama	willcoxi	Chamidae	extinct	narrow	53.769	0.00734256	0.00841113	0.0175491	5.24469e-14	9.43909e+08
bivalvia	Chesapecten	madisonius	Pectinidae	extinct	narrow	86.037	0.0192909	0.0220983	0.0461061	1.48391e-13	2.4799e+09
bivalvia	Chesapecten	jeffersonius	Pectinidae	extinct	narrow	162.547	0.0476889	0.0422393	0.118414	3.66837e-13	1.01329e+10
bivalvia	Chesapecten	septenarius	Pectinidae	extinct	narrow	59.307	0.00846951	0.00970208	0.0202425	6.515e-14	1.08878e+09
bivalvia	Chione	erosa	Veneridae	extinct	broad	21.518	0.000729167	0.00109984	0.00222093	5.20834e-15	1.24438e+08
bivalvia	Chionopsis	cribraria	Veneridae	extinct	broad	33.093	0.00250878	0.00287388	0.0059961	1.79198e-14	3.22511e+08
bivalvia	Codakia	orbicularis	Lucinidae	extant	broad	56.2294	0.00406999	0.00974415	0.0160494	2.90714e-14	1.04481e+09
bivalvia	Costaglycymeris	subovata	Glycymerididae	extinct	narrow	44.1105	0.00328088	0.00440018	0.0103035	2.52375e-14	5.9007e+08
bivalvia	Crassinella	lunulata	Crassatellidae	extant	narrow	5.65	3.37825e-05	5.819e-05	0.000118882	2.41425e-16	8184900
bivalvia	Crassostrea	virginica	Ostreidae	extant	broad	89.3822	0.00766102	0.0114173	0.0269086	5.89309e-14	2.86741e+09
bivalvia	Ctena	orbiculata	Lucinidae	extant	broad	20.1145	0.000305285	0.00097855	0.00156961	2.18061e-15	1.08331e+08
bivalvia	Ctenoides	floridana	Limidae	extinct	narrow	39.719	0.00348855	0.00399624	0.0083378	2.6835e-14	4.48464e+08
bivalvia	Ctenoides	mitis	Limidae	extant	narrow	54.2	0.00424661	0.00923446	0.0155606	3.26662e-14	8.92107e+08
bivalvia	Ctenoides	scabra	Limidae	extant	narrow	64.9977	0.00613868	0.0102856	0.021776	4.72206e-14	1.41186e+09
bivalvia	Cumingia	tellinoides	Semelidae	extant	narrow	14.4093	0.000211732	0.000355366	0.000750443	1.51237e-15	5.42597e+07
bivalvia	Cyclocardia	granulata	Carditidae	extinct	broad	18.445	0.00056229	0.000822218	0.00181268	4.01636e-15	1.03181e+08
bivalvia	Cymatoica	marcottae	Tellinidae	extinct	narrow	17.71	0.000571617	0.000705664	0.00139714	4.08298e-15	8.08744e+07
bivalvia	Dallocardia	muricata	Cardiidae	extinct	broad	32.4545	0.000860415	0.00306016	0.00449484	6.14582e-15	3.35604e+08
bivalvia	Dendostrea	frons	Ostreidae	extant	narrow	36.6805	0.00104591	0.0045641	0.00629627	8.04548e-15	4.36971e+08
bivalvia	Dinocardium	robustum	Cardiidae	extant	broad	98.0407	0.0213304	0.0260303	0.0559299	1.5236e-13	3.57341e+09
bivalvia	Divalinga	quadrisulcata	Lucinidae	extant	broad	14.8055	0.00043002	0.000547774	0.00110747	3.07157e-15	6.62562e+07
bivalvia	Dosinia	discus	Veneridae	extant	broad	71.2617	0.00844153	0.0114311	0.0260837	6.02967e-14	1.80351e+09
bivalvia	Dosinia	elegans	Veneridae	extant	broad	71.37	0.00840161	0.00888146	0.0272286	6.00115e-14	1.88326e+09
bivalvia	Eucrassatella	meridionalis	Crassatellidae	extinct	narrow	72.5268	0.0119382	0.0150464	0.0347542	8.52727e-14	1.92903e+09
bivalvia	Eucrassatella	speciosa	Crassatellidae	extant	narrow	55.814	0.00659706	0.00834198	0.0167754	4.71219e-14	1.03611e+09
bivalvia	Eurytellina	alternata	Tellinidae	extant	broad	45.109	0.00285699	0.00317966	0.00743042	2.0407e-14	6.40008e+08
bivalvia	Euvola	hemicyclica	Pectinidae	extinct	narrow	75.96	0.0146438	0.016775	0.0349995	1.12645e-13	1.88251e+09
bivalvia	Glans	dominguensis	Carditidae	extant	narrow	6.295	3.82945e-05	5.91461e-05	0.000102229	2.73532e-16	8.20173e+06
bivalvia	Globivenus	rigida	Veneridae	extant	broad	77.994	0.0108637	0.0139239	0.0340788	7.75981e-14	2.14938e+09
bivalvia	Glycymeris	aberrans	Glycymerididae	extinct	narrow	60.981	0.00640863	0.0108788	0.0235103	4.92971e-14	1.15794e+09
bivalvia	Glycymeris	americana	Glycymerididae	extant	narrow	74.173	0.00914528	0.0126288	0.0314348	7.03483e-14	1.82356e+09
bivalvia	Glycymeris	decussata	Glycymerididae	extant	narrow	20.9135	0.000261175	0.00058486	0.0015199	2.00904e-15	1.14728e+08
bivalvia	Glycymeris	duplinensis	Glycymerididae	extinct	narrow	6.281	2.20875e-05	6.2627e-05	0.000134782	1.69904e-16	7.57848e+06
bivalvia	Glycymeris	laevis	Glycymerididae	extinct	narrow	53.006	0.00660587	0.00756723	0.0157883	5.08144e-14	8.49205e+08
bivalvia	Glycymeris	quinquerugata	Glycymerididae	extinct	narrow	23.177	0.000916817	0.000854415	0.00226391	7.05244e-15	1.36186e+08
bivalvia	Gregariella	coralliophaga	Mytilidae	extant	narrow	18.1875	0.00040932	0.00052462	0.00128401	3.14862e-15	8.09837e+07
bivalvia	Interchlamys	interlineata	Pectinidae	extinct	narrow	53.748	0.0068122	0.00780359	0.0162815	5.24016e-14	8.75729e+08
bivalvia	Laciolina	magna	Tellinidae	extant	broad	120.271	0.0283237	0.036302	0.0888494	2.02312e-13	5.60382e+09
bivalvia	Laevicardium	mortoni	Cardiidae	extant	broad	17.1417	0.000280015	0.000366636	0.00106887	2.00011e-15	9.88977e+07
bivalvia	Laevicardium	serratum	Cardiidae	extant	narrow	38.8413	0.00173514	0.00343222	0.00718141	1.23939e-14	4.85797e+08
bivalvia	Leporimetis	intastriata	Tellinidae	extant	narrow	45.6733	0.00252907	0.00521012	0.0099849	1.80648e-14	6.61048e+08
bivalvia	Leporimetis	magnoliana	Tellinidae	extinct	broad	80.821	0.0180902	0.0207229	0.0432364	1.29216e-13	2.32555e+09
bivalvia	Leptopecten	irremotis	Pectinidae	extinct	narrow	22.215	0.000964531	0.0011049	0.00230527	7.41947e-15	1.23993e+08
bivalvia	Limaria	caloosana	Limidae	extinct	narrow	50.756	0.00600139	0.00687478	0.0143436	4.61645e-14	7.71497e+08
bivalvia	Limaria	carolinensis	Limidae	extant	narrow	34.72	0.00162694	0.00229434	0.00584282	1.25149e-14	3.33024e+08
bivalvia	Lindapecten	muscosus	Pectinidae	extant	narrow	24.8	0.000732031	0.00129379	0.00266683	5.631e-15	1.73851e+08
bivalvia	Lirophora	latilirata	Veneridae	extant	broad	23.9505	0.00149662	0.00172046	0.00359535	1.06902e-14	1.94214e+08
bivalvia	Lithophaga	antillarum	Mytilidae	extant	narrow	97.905	0.00433302	0.0354908	0.0447878	3.33309e-14	3.30065e+09
bivalvia	Lucina	pensylvanica	Lucinidae	extant	broad	39.0683	0.00228482	0.00403532	0.00718814	1.63201e-14	4.72033e+08
bivalvia	Lucinisca	nassula	Lucinidae	extant	broad	7.874	6.00735e-05	6.68583e-05	0.000156239	4.29097e-16	1.34574e+07
bivalvia	Lunarca	ovalis	Arcidae	extant	narrow	26.4215	0.000481915	0.000967346	0.00212319	3.70704e-15	2.5591e+08
bivalvia	Macoma	arctata	Tellinidae	extinct	broad	29.895	0.0012583	0.00177448	0.00451894	8.98789e-15	2.57567e+08
bivalvia	Macoma	constricta	Tellinidae	extant	narrow	38.2645	0.0021984	0.00298922	0.00639045	1.57029e-14	4.45554e+08
bivalvia	Macrocallista	maculata	Veneridae	extant	broad	45.289	0.00402819	0.00487519	0.011058	2.87728e-14	6.50556e+08
bivalvia	Macrocallista	nimbosa	Veneridae	extant	broad	126.806	0.040349	0.0458281	0.0989767	2.88207e-13	6.33789e+09
bivalvia	Mercenaria	campechiensis	Veneridae	extant	broad	108.031	0.0235121	0.0363807	0.0802193	1.67943e-13	4.52647e+09
bivalvia	Merisca	aequistriata	Tellinidae	extant	broad	16.3095	0.000312236	0.000458703	0.00100754	2.23026e-15	6.76305e+07
bivalvia	Miltha	caloosaensis	Lucinidae	extinct	broad	68.924	0.0127514	0.0146072	0.0304766	9.10818e-14	1.63924e+09
bivalvia	Miltha	carmenae	Lucinidae	extinct	narrow	87.068	0.013859	0.0177628	0.0434746	9.89926e-14	2.74199e+09
bivalvia	Modiolus	gigas	Mytilidae	extinct	narrow	95.083	0.014834	0.0170375	0.0450714	1.14108e-13	3.09406e+09
bivalvia	Nodipecten	collierensis	Pectinidae	extinct	narrow	126.146	0.0338845	0.0511098	0.103207	2.6065e-13	5.78264e+09
bivalvia	Ostrea	compressirostra	Ostreidae	extinct	narrow	76.23	0.00926922	0.0130716	0.0332885	7.13017e-14	1.89735e+09
bivalvia	Ostrea	coxi	Ostreidae	extinct	narrow	38.066	0.00317541	0.00363753	0.00758938	2.44262e-14	4.08209e+08
bivalvia	Ostrea	equestris	Ostreidae	extant	narrow	43.208	0.00235853	0.00311816	0.00762963	1.81426e-14	5.55316e+08
bivalvia	Ostrea	greeni	Ostreidae	extinct	narrow	51.845	0.00628999	0.00720538	0.0150334	4.83846e-14	8.08598e+08
bivalvia	Ostrea	lawrencei	Ostreidae	extinct	narrow	36.4685	0.00112038	0.00174388	0.00507288	8.61827e-15	3.76858e+08
bivalvia	Ostrea	sculpturata	Ostreidae	extinct	narrow	62.0845	0.00625387	0.0080155	0.019618	4.81067e-14	1.23732e+09
bivalvia	Panchione	ulocyma	Veneridae	extinct	broad	38.5613	0.0025426	0.00338241	0.00820897	1.81615e-14	4.61997e+08
bivalvia	Papyridea	lata	Cardiidae	extant	narrow	25	0.000544337	0.00119484	0.00243211	3.88812e-15	1.73409e+08
bivalvia	Parvilucina	crenella	Lucinidae	extant	broad	8.532	0.000108201	0.000100836	0.000267181	7.72861e-16	1.60723e+07
bivalvia	Perna	conradiana	Mytilidae	extinct	narrow	109.746	0.0339083	0.038843	0.0810424	2.60833e-13	4.35901e+09
bivalvia	Petricolaria	pholadiformis	Veneridae	extant	broad	30.523	0.00136261	0.00200643	0.00451798	9.73291e-15	2.69935e+08
bivalvia	Phacoides	pectinatus	Lucinidae	extant	narrow	45.664	0.00174771	0.00343885	0.00854657	1.24836e-14	6.5756e+08
bivalvia	Pinna	caloosaensis	Pinnidae	extinct	narrow	107.502	0.0323704	0.0392788	0.078704	2.49003e-13	4.48068e+09
bivalvia	Placunanomia	plicata	Anomiidae	extinct	narrow	59.5785	0.00705777	0.0087574	0.0199205	5.42905e-14	1.10075e+09
bivalvia	Planicardium	acutilaqueatum	Cardiidae	extinct	broad	103.981	0.0191127	0.0169286	0.0474579	1.36519e-13	4.06105e+09
bivalvia	Planicardium	virginianum	Cardiidae	extinct	broad	34.345	0.0017105	0.00241217	0.00614289	1.22178e-14	3.50127e+08
bivalvia	Pleurolucina	amabilis	Lucinidae	extinct	broad	9.968	0.000176387	0.000202057	0.000421573	1.25991e-15	2.26751e+07
bivalvia	Pleuromeris	auroraensis	Carditidae	extinct	narrow	5.984	5.01148e-05	4.51744e-05	0.00012114	3.57963e-16	7.33199e+06
bivalvia	Pleuromeris	scituloides	Carditidae	extinct	narrow	3.957	1.43449e-05	2.02294e-05	5.15166e-05	1.02463e-16	2.9363e+06
bivalvia	Pleuromeris	tridentata	Carditidae	extant	broad	7.594	6.20582e-05	8.59329e-05	0.000193462	4.43273e-16	1.24499e+07
bivalvia	Plicatula	hunterae	Plicatulidae	extinct	narrow	50.6905	0.00619004	0.00709088	0.0147945	4.76157e-14	7.95748e+08
bivalvia	Plicatula	marginata	Plicatulidae	extinct	narrow	28.006	0.00161029	0.00184464	0.00384867	1.23869e-14	2.07008e+08
bivalvia	Pteromeris	abbreviata	Carditidae	extinct	broad	5.034	2.44347e-05	3.44582e-05	8.77521e-05	1.74533e-16	5.00162e+06
bivalvia	Pteromeris	perplana	Carditidae	extant	broad	5.3	2.66817e-05	5.80206e-05	9.77679e-05	1.90583e-16	5.60515e+06
bivalvia	Scissula	similis	Tellinidae	extant	narrow	21.434	0.000623533	0.000799173	0.00195598	4.45381e-15	1.23366e+08
bivalvia	Semele	alumensis	Semelidae	extinct	narrow	31.1795	0.00139072	0.00196121	0.00499447	9.93369e-15	2.84671e+08
bivalvia	Semele	bellastriata	Semelidae	extant	narrow	9.4	7.46607e-05	9.6647e-05	0.000237225	5.33291e-16	1.99147e+07
bivalvia	Semele	harveyensis	Semelidae	extinct	narrow	53.922	0.00671358	0.00828794	0.0164093	4.79541e-14	9.49862e+08
bivalvia	Semele	perlamellosa	Semelidae	extinct	narrow	70.205	0.00860762	0.0110323	0.0270015	6.1483e-14	1.70301e+09
bivalvia	Semele	proficua	Semelidae	extant	narrow	31.8137	0.000959547	0.00262066	0.00437909	6.85391e-15	3.12252e+08
bivalvia	Semele	purpurascens	Semelidae	extant	narrow	29.837	0.00129625	0.00166139	0.00406625	9.25893e-15	2.56462e+08
bivalvia	Spondylus	americanus	Spondylidae	extant	narrow	55.3435	0.00525849	0.00673973	0.0164955	4.04499e-14	1.04039e+09
bivalvia	Spondylus	bostrychites	Spondylidae	extinct	narrow	110.68	0.0336794	0.0385808	0.0804953	2.59072e-13	4.32959e+09
bivalvia	Spondylus	rotundatus	Spondylidae	extinct	narrow	68.175	0.0115281	0.0132058	0.0275526	8.86775e-14	1.48197e+09
bivalvia	Stewartia	floridana	Lucinidae	extant	broad	29.9165	0.00120235	0.0017608	0.00386123	8.58821e-15	2.58648e+08
bivalvia	Strigilla	mirabilis	Tellinidae	extant	narrow	10.312	0.00017276	0.000213273	0.000422258	1.234e-15	2.44427e+07
bivalvia	Striostrea	paucichomata	Ostreidae	extinct	narrow	62.829	0.0083674	0.0115643	0.0235758	6.43646e-14	1.30533e+09
bivalvia	Tellidora	cristata	Tellinidae	extant	broad	29.975	0.00115659	0.00128722	0.00300805	8.26137e-15	2.59094e+08
bivalvia	Tellinella	listeri	Tellinidae	extant	broad	58.999	0.00152165	0.0124635	0.0157283	1.08689e-14	1.1591e+09
bivalvia	Timoclea	grus	Veneridae	extant	broad	8.6775	6.85176e-05	0.000109743	0.000251405	4.89412e-16	1.77499e+07
bivalvia	Trachycardium	aclinensis	Cardiidae	extinct	narrow	79.846	0.0167951	0.0199619	0.0405807	1.19965e-13	2.26407e+09
bivalvia	Trachycardium	egmontianum	Cardiidae	extant	broad	55.2305	0.00464969	0.00586797	0.0123181	3.32121e-14	1.00412e+09
bivalvia	Trachycardium	evergladeensis	Cardiidae	extant	broad	38.442	0.00248651	0.00422092	0.00912184	1.77608e-14	4.49274e+08
bivalvia	Trachycardium	oedalium	Cardiidae	extinct	broad	48.473	0.00583733	0.00668684	0.0139515	4.16952e-14	7.50406e+08
bivalvia	Trachycardium	stiriatum	Cardiidae	extinct	narrow	44.866	0.00320522	0.00452005	0.0115109	2.28944e-14	6.56087e+08
bivalvia	Trigoniocardia	willcoxi	Cardiidae	extinct	broad	10.685	0.000205688	0.000235622	0.000491605	1.4692e-15	2.64418e+07
bivalvia	Tucetona	pectinata	Glycymerididae	extant	narrow	25.951	0.000670757	0.00119695	0.00311026	5.15967e-15	1.74888e+08
bivalvia	Undulostrea	locklini	Ostreidae	extinct	narrow	40.867	0.00337597	0.00416766	0.00825152	2.5969e-14	4.77645e+08
gastropoda	Acantholabia	sarasotaensis	Muricidae	extinct	narrow	31.749	4.59e-05	5.26e-05	0.000109759	8.27e-13	5.90359e+06
gastropoda	Agathotoma	candidissima	Mangeliidae	extant	narrow	5.154	2.9e-06	3.71e-06	9.08e-06	4.01e-14	572969
gastropoda	Architectonica	nobilis	Architectonicidae	extant	narrow	38.733	4.29e-05	6.835e-05	0.000174386	6.095e-13	1.01573e+07
gastropoda	Astralium	phoebium	Turbinidae	extant	narrow	22.1065	1.4485e-05	3.02e-05	5.555e-05	2.392e-13	3.86339e+06
gastropoda	Bellaspira	pentagonalis	Drilliidae	extant	narrow	12.599	1.2e-05	1.82e-05	3.67e-05	1.66e-13	2.05425e+06
gastropoda	Bostrycapulus	aculeatus	Calyptraeidae	extant	narrow	8.788	5.11e-06	5.69e-06	1.33e-05	7.59e-14	1.14557e+06
gastropoda	Bulla	occidentalis	Bullidae	extant	broad	40.1998	7.52782e-05	0.000129705	0.000231242	7.74575e-13	1.68602e+07
gastropoda	Busycon	carica	Buccinidae	extant	narrow	62.69	5.59e-05	6.33e-05	0.000201201	7.74e-13	2.03411e+07
gastropoda	Calophos	wilsoni	Nassariidae	extinct	narrow	30.116	7.24e-05	8.66e-05	0.000196611	6.14e-13	1.16441e+07
gastropoda	Calotrophon	ostrearum	Muricidae	extant	broad	19.1563	1.38667e-05	1.78667e-05	4.40333e-05	2.5e-13	2.87727e+06
gastropoda	Calyptraea	centralis	Calyptraeidae	extant	narrow	29.358	4.54e-05	5.6e-05	0.000110906	6.73e-13	6.41988e+06
gastropoda	Cancellaria	reticulata	Cancellariidae	extant	narrow	44.034	6.21e-05	7.96e-05	0.000194761	8.59e-13	1.22837e+07
gastropoda	Cancellaria	tabulata	Cancellariidae	extinct	narrow	37.299	7.54e-05	8.64e-05	0.00018018	1.04e-12	9.69129e+06
gastropoda	Cassis	floridensis	Cassidae	extinct	narrow	145.367	0.000461444	0.000528598	0.00110287	7.28e-12	5.932e+07
gastropoda	Cassis	madagascariensis	Cassidae	extant	narrow	44.0735	4.705e-05	7.235e-05	0.000183549	7.425e-13	1.08181e+07
gastropoda	Celatoconus	nux	Buccinidae	extinct	narrow	15.269	1.91e-05	2.36e-05	4.67e-05	2.64e-13	2.70284e+06
gastropoda	Cerodrillia	prion	Drilliidae	extinct	narrow	10.442	7.67e-06	1.08e-05	2.76e-05	1.06e-13	1.57034e+06
gastropoda	Cheilea	equestris	Calyptraeidae	extant	narrow	41.67	5.35e-05	6.86e-05	0.000167781	7.94e-13	1.05821e+07
gastropoda	Chicoreus	dilectus	Muricidae	extant	narrow	21.41	1.7e-05	2.18e-05	5.33e-05	3.06e-13	3.36299e+06
gastropoda	Chicoreus	floridanus	Muricidae	extinct	broad	36.826	4.46e-05	5.665e-05	0.000131876	8.035e-13	7.33617e+06
gastropoda	Chicoreus	shirleyae	Muricidae	extinct	broad	42.915	6.42e-05	7.93e-05	0.000157019	1.16e-12	9.08917e+06
gastropoda	Cinctura	rhomboidea	Fasciolariidae	extinct	broad	105.757	0.000289977	0.000381285	0.00078182	4.01e-12	4.29762e+07
gastropoda	Circulus	costulatus	Liotiidae	extinct	narrow	23.772	1.24e-05	3.52e-05	7.58e-05	2.05e-13	4.26261e+06
gastropoda	Clathrodrillia	anteaphanitoma	Drilliidae	extinct	narrow	13.282	1.08e-05	1.53e-05	3.89e-05	1.5e-13	2.21559e+06
gastropoda	Clathrodrillia	emmonsi	Drilliidae	extinct	narrow	7.785	5.085e-06	7.17e-06	1.825e-05	7.03e-14	1.04055e+06
gastropoda	Clathrodrillia	gracilina	Drilliidae	extinct	narrow	12.3015	9.84e-06	1.384e-05	3.525e-05	1.3595e-13	2.01013e+06
gastropoda	Compsodrillia	drewi	Pseudomelatomidae	extinct	narrow	10.602	4.68e-06	1.33e-05	2.85e-05	6.47e-14	1.60519e+06
gastropoda	Conus	adversarius	Conidae	extinct	broad	60.8477	0.000140619	0.000168064	0.000367779	1.94667e-12	2.0086e+07
gastropoda	Conus	anabathrum	Conidae	extant	narrow	32.4725	4.15e-05	6.505e-05	0.000150824	5.745e-13	7.95094e+06
gastropoda	Conus	bassi	Conidae	extinct	broad	33.014	6.33e-05	7.25e-05	0.000151204	8.75e-13	8.13276e+06
gastropoda	Conus	delessertii	Conidae	extant	broad	50.202	9.2844e-05	0.000122071	0.000254945	1.2835e-12	1.52033e+07
gastropoda	Conus	evergladesensis	Conidae	extinct	narrow	28.091	3.26e-05	4.18e-05	0.000102338	4.51e-13	6.45458e+06
gastropoda	Conus	haytensis	Conidae	extinct	broad	146.662	0.000515616	0.000608355	0.00124312	7.13e-12	6.88564e+07
gastropoda	Conus	jaspideus	Conidae	extant	narrow	20.914	1.71e-05	2.885e-05	6.51e-05	2.37e-13	4.2397e+06
gastropoda	Conus	marylandicus	Conidae	extinct	broad	33.433	4.6e-05	5.95e-05	0.000146067	6.36e-13	8.28953e+06
gastropoda	Conus	miamiensis	Conidae	extinct	broad	33.145	6.36e-05	7.29e-05	0.000152038	8.8e-13	8.17766e+06
gastropoda	Conus	oniscus	Conidae	extinct	broad	34.059	6.02e-05	7.43e-05	0.000147044	8.32e-13	8.51178e+06
gastropoda	Conus	paranobilis	Conidae	extinct	broad	51.299	0.000118813	0.000136104	0.000283968	1.64e-12	1.52737e+07
gastropoda	Conus	spurius	Conidae	extant	narrow	54.3825	7.9766e-05	0.000119975	0.000213806	1.105e-12	1.68799e+07
gastropoda	Conus	yaquensis	Conidae	extinct	broad	50.071	0.000116094	0.000133028	0.000277524	1.605e-12	1.49272e+07
gastropoda	Crepidula	fornicata	Calyptraeidae	extant	broad	22.5847	2.261e-05	3.5134e-05	7.81493e-05	3.363e-13	5.07871e+06
gastropoda	Crepidula	plana	Calyptraeidae	extant	narrow	31.4065	4.761e-05	5.86e-05	0.000126171	7.085e-13	7.34771e+06
gastropoda	Cyclostremiscus	bartschi	Liotiidae	extinct	narrow	1.017	2.31e-07	3.25e-07	8.28e-07	3.81e-15	47189.9
gastropoda	Cymatophos	lindae	Buccinidae	extinct	narrow	68.404	0.000179233	0.000205317	0.000428375	2.48e-12	2.30409e+07
gastropoda	Dallitesta	coensis	Naticidae	extinct	narrow	39.2167	3.38333e-05	4.77667e-05	0.000121551	7.10667e-13	6.92736e+06
gastropoda	Distorsio	clathrata	Personidae	extant	narrow	41.649	3.81e-05	6.81e-05	0.00017687	6.02e-13	9.94528e+06
gastropoda	Ecphora	bradleyae	Muricidae	extinct	broad	59.764	0.000113446	0.000129955	0.00027114	2.04e-12	14583768
gastropoda	Ecphora	quadricostata	Muricidae	extinct	broad	54.823	0.00010029	0.000114905	0.000239737	1.805e-12	1.28947e+07
gastropoda	Eupleura	caudata	Muricidae	extant	broad	15.621	5.835e-06	6.395e-06	2.02e-05	1.0525e-13	2.15401e+06
gastropoda	Eupleura	leonensis	Muricidae	extinct	broad	28.974	4.03e-05	4.62e-05	9.64e-05	7.27e-13	5.18582e+06
gastropoda	Eupleura	metae	Muricidae	extinct	broad	24.7595	3.24e-05	3.71e-05	7.74e-05	5.835e-13	4.16258e+06
gastropoda	Eupleura	miocenica	Muricidae	extinct	narrow	28.5845	3.22e-05	4.015e-05	9.19e-05	5.795e-13	5.08458e+06
gastropoda	Euspira	sayana	Naticidae	extinct	narrow	38.382	4.47e-05	4.17e-05	0.000110443	9.4e-13	6.64371e+06
gastropoda	Fasciolaria	okeechobensis	Fasciolariidae	extinct	broad	134.857	0.000307149	0.000393668	0.000963505	4.25e-12	6.07692e+07
gastropoda	Favartia	cellulosa	Muricidae	extant	narrow	19.3815	1.785e-05	2.175e-05	4.98e-05	3.215e-13	2.9536e+06
gastropoda	Fusinus	watermani	Fasciolariidae	extinct	narrow	116.208	0.000250466	0.000321019	0.000785694	3.465e-12	4.95545e+07
gastropoda	Gelasinostoma	elegantula	Turbinidae	extinct	narrow	5.072	1.1e-06	2.08e-06	4.97e-06	1.82e-14	468030
gastropoda	Gemophos	auritulus	Buccinidae	extant	narrow	26.6	1.88e-05	4.12e-05	8.38e-05	2.59e-13	5.97538e+06
gastropoda	Gemophos	tinctus	Buccinidae	extant	narrow	24.2255	2.5e-05	3.02e-05	7.25e-05	3.46e-13	5.23463e+06
gastropoda	Heilprinia	carolinensis	Fasciolariidae	extinct	broad	50.271	0.000115426	0.000132224	0.000275873	1.6e-12	1.48383e+07
gastropoda	Heilprinia	equalis	Fasciolariidae	extinct	narrow	61.475	5.76e-05	0.000163459	0.000351786	7.97e-13	1.97802e+07
gastropoda	Heilprinia	florida	Fasciolariidae	extinct	broad	44.406	9.67e-05	0.000110766	0.000231103	1.34e-12	1.24303e+07
gastropoda	Hemipolygona	nosali	Fasciolariidae	extinct	narrow	43.327	9.33e-05	0.00010692	0.000223079	1.29e-12	1.19987e+07
gastropoda	Hesperisternia	filicata	Buccinidae	extinct	narrow	34.959	6.87e-05	7.87e-05	0.000164179	9.5e-13	8.83065e+06
gastropoda	Hexaplex	fulvescens	Muricidae	extant	narrow	93.9555	8.715e-05	0.000151675	0.000412364	1.57e-12	2.8187e+07
gastropoda	Hexaplex	hertweckorum	Muricidae	extinct	narrow	80.952	0.000175017	0.000200487	0.000418298	3.15e-12	2.24989e+07
gastropoda	Hexaplex	jameshoubricki	Muricidae	extinct	narrow	85.716	0.000190561	0.000218293	0.000455449	3.435e-12	2.44972e+07
gastropoda	Hipponix	floridanus	Hipponicidae	extant	narrow	17.585	2.26e-05	2.59e-05	5.4e-05	3.56e-13	2.90551e+06
gastropoda	Hystrivasum	locklini	Turbinellidae	extinct	narrow	95.946	0.000290647	0.000332945	0.000694659	4.02e-12	3.73635e+07
gastropoda	Hystrivasum	olssoni	Turbinellidae	extinct	narrow	91.169	0.0002455	0.000303071	0.000600049	3.4e-12	3.47343e+07
gastropoda	Hystrivasum	schrinerae	Turbinellidae	extinct	narrow	121.169	0.000368609	0.00045505	0.000900951	5.1e-12	5.21522e+07
gastropoda	Hystrivasum	squamosum	Turbinellidae	extinct	narrow	105.942	0.000304254	0.000375603	0.000743655	4.21e-12	4.3047e+07
gastropoda	Linatella	caudata	Ranellidae	extinct	narrow	92.656	0.000242475	0.000277762	0.000579526	3.82e-12	3.11708e+07
gastropoda	Lindoliva	diegelae	Olividae	extinct	narrow	118.565	0.000193909	0.000346026	0.000899144	2.68e-12	5.05583e+07
gastropoda	Lithopoma	tectariaeformis	Turbinidae	extinct	narrow	34.786	5.18e-05	6.4e-05	0.000126706	8.57e-13	7.33447e+06
gastropoda	Lobatus	diegelae	Strombidae	extinct	narrow	91.96	0.00011827	0.000211051	0.000548412	1.87e-12	3.08368e+07
gastropoda	Lobatus	hertweckorum	Strombidae	extinct	narrow	177.766	0.000615346	0.000704898	0.00147071	9.715e-12	7.91046e+07
gastropoda	Lobatus	mayacensis	Strombidae	extinct	narrow	135.801	0.00027384	0.000350976	0.000859016	4.32e-12	5.4179e+07
gastropoda	Mangelia	gardnerae	Mangeliidae	extinct	narrow	5.93	3.42e-06	4.82e-06	1.23e-05	4.72e-14	699099
gastropoda	Massyla	propevenusta	Cancellariidae	extinct	narrow	39.341	8.13e-05	9.32e-05	0.000194376	1.12e-12	1.04549e+07
gastropoda	Monoplex	krebsii	Ranellidae	extant	narrow	45.8185	5.02e-05	7.61e-05	0.000192627	7.92e-13	1.14066e+07
gastropoda	Murexiella	faceta	Muricidae	extinct	narrow	27.1765	3.515e-05	4.175e-05	8.485e-05	6.33e-13	4.72943e+06
gastropoda	Murexiella	glypta	Muricidae	extant	narrow	17.003	1.23e-05	1.57e-05	3.85e-05	2.21e-13	2.42624e+06
gastropoda	Murexiella	graceae	Muricidae	extinct	narrow	33.5275	3.23e-05	4.135e-05	0.000101288	5.82e-13	6.38822e+06
gastropoda	Murexiella	shilohensis	Muricidae	extinct	narrow	14.238	1.157e-05	1.5e-05	3.28e-05	2.09e-13	1.88547e+06
gastropoda	Murexsul	oxytatus	Muricidae	extinct	narrow	30.667	4.37e-05	5.01e-05	0.00010449	7.88e-13	5.62017e+06
gastropoda	Nassarius	cornellianus	Nassariidae	extinct	narrow	3.835	3e-06	4.22e-06	1.08e-05	2.54e-14	613146
gastropoda	Nassarius	quadridentatus	Nassariidae	extinct	narrow	6.4985	6.365e-06	8.975e-06	2.285e-05	5.395e-14	1.30252e+06
gastropoda	Nassarius	vibex	Nassariidae	extant	narrow	15.653	1.84e-05	2.72e-05	6.7e-05	1.56e-13	4.58093e+06
gastropoda	Naticarius	plicatella	Naticidae	extinct	narrow	45.195	6.53e-05	7.47e-05	0.000155955	1.37e-12	8.38831e+06
gastropoda	Neverita	duplicata	Naticidae	extant	broad	57.337	7.13377e-05	9.52953e-05	0.000202263	1.49867e-12	1.21082e+07
gastropoda	Oliva	sayana	Olividae	extant	broad	44.621	5.718e-05	7.752e-05	0.000181517	7.918e-13	1.26082e+07
gastropoda	Panamurex	clarksvillensis	Muricidae	extinct	narrow	24.846	2.045e-05	2.885e-05	7.35e-05	3.69e-13	4.1887e+06
gastropoda	Perplicaria	perplexa	Cancellariidae	extinct	narrow	19.619	3.01e-05	3.45e-05	7.2e-05	4.17e-13	3.87393e+06
gastropoda	Phos	sloani	Buccinidae	extinct	narrow	20.508	2.63e-05	3.375e-05	7.255e-05	3.635e-13	4.17572e+06
gastropoda	Phos	vaughani	Buccinidae	extinct	narrow	15.123	1.3e-05	1.84e-05	4.69e-05	1.8e-13	2.67034e+06
gastropoda	Phyllonotus	globosus	Muricidae	extant	narrow	109.668	0.000256896	0.000306255	0.000621279	4.63e-12	3.47648e+07
gastropoda	Phyllonotus	leonensis	Muricidae	extinct	narrow	67.578	0.000135218	0.000154896	0.000323177	2.44e-12	1.73826e+07
gastropoda	Phyllonotus	pomum	Muricidae	extant	narrow	49.0817	3.96333e-05	8.98657e-05	0.00016507	7.14333e-13	1.10323e+07
gastropoda	Phyllonotus	riparius	Muricidae	extinct	narrow	39.4245	5.08e-05	6.35e-05	0.00014537	9.145e-13	8.04903e+06
gastropoda	Polinices	carolinianus	Naticidae	extinct	narrow	25.901	2.32e-05	3.05e-05	6.59e-05	4.875e-13	3.81657e+06
gastropoda	Polinices	lacteus	Naticidae	extant	narrow	20.364	6.7e-06	2.4e-05	4.18e-05	1.405e-13	2.6893e+06
gastropoda	Polygona	angulata	Fasciolariidae	extant	narrow	53.73	8.25e-05	0.000105711	0.000258729	1.14e-12	1.63183e+07
gastropoda	Polygona	jucunda	Fasciolariidae	extant	narrow	30.563	3.68e-05	4.72e-05	0.000115528	5.09e-13	7.28648e+06
gastropoda	Pterorytis	fluviana	Muricidae	extinct	narrow	54.045	8.93e-05	0.000110215	0.000218215	1.61e-12	1.26315e+07
gastropoda	Pterorytis	roxaneae	Muricidae	extinct	narrow	32.37	4.725e-05	5.415e-05	0.000112922	8.515e-13	6.07376e+06
gastropoda	Ptychosalpinx	laqueata	Buccinidae	extinct	narrow	40.846	6.15e-05	8.27023e-05	0.000194668	8.50333e-13	1.11451e+07
gastropoda	Sconsia	hodgii	Cassidae	extinct	narrow	59.196	0.000110901	0.000135137	0.000301792	1.7475e-12	1.65852e+07
gastropoda	Semicassis	granulata	Cassidae	extant	narrow	54.113	6.54e-05	9.6174e-05	0.000242003	1.0315e-12	1.44855e+07
gastropoda	Sigatica	bathyora	Naticidae	extinct	narrow	7.574	3.62e-06	5.34e-06	1.168e-05	7.59e-14	659695
gastropoda	Sigatica	semisulcata	Naticidae	extant	narrow	5.439	2.06e-06	2.64e-06	6.46e-06	4.32e-14	407273
gastropoda	Sinistrofulgur	contrarium	Buccinidae	extinct	narrow	153.806	0.000372268	0.00047713	0.00116778	5.15e-12	7.3653e+07
gastropoda	Sinum	perspectivum	Naticidae	extant	narrow	28.5235	1.68e-05	2.58e-05	6.375e-05	3.53e-13	4.3464e+06
gastropoda	Sinum	polandi	Naticidae	extinct	narrow	30.634	2.43e-05	3.12e-05	7.63e-05	5.11e-13	4.81252e+06
gastropoda	Siphocypraea	carolinensis	Conidae	extinct	narrow	35.728	4.45e-05	6.28e-05	0.000159891	6.16e-13	9.11331e+06
gastropoda	Strombus	floridanus	Strombidae	extinct	narrow	62.5965	0.000112571	0.000140524	0.000321553	1.775e-12	1.77992e+07
gastropoda	Strombus	pugilis	Strombidae	extant	narrow	76.424	6.5352e-05	0.000202363	0.000379278	1.031e-12	2.37435e+07
gastropoda	Terebra	dislocata	Terebridae	extant	broad	34.09	3.82e-05	5.625e-05	0.000120233	5.28e-13	8.60096e+06
gastropoda	Terebraspira	elegans	Fasciolariidae	extinct	narrow	76.343	0.000149419	0.000193423	0.00047496	2.07e-12	2.69546e+07
gastropoda	Tonna	galea	Tonnidae	extant	narrow	59.101	8.3633e-05	0.000107232	0.000262413	1.3215e-12	1.65507e+07
gastropoda	Toroliva	gladeensis	Olividae	extinct	narrow	25.863	4.46e-05	5.11e-05	0.000106667	6.17e-13	5.73725e+06
gastropoda	Trajana	pyta	Buccinidae	extinct	narrow	14.11	1.88e-05	2.16e-05	4.5e-05	2.61e-13	2.42218e+06
gastropoda	Triplofusus	giganteus	Fasciolariidae	extant	broad	243.171	0.000888409	0.00114466	0.00251556	1.22725e-11	1.46212e+08
gastropoda	Trochita	floridana	Calyptraeidae	extinct	narrow	47.484	9.01e-05	0.00011125	0.000220264	1.34e-12	1.27502e+07
gastropoda	Turbinella	hoerlei	Turbinellidae	extinct	narrow	155.48	0.000376398	0.000482424	0.00118074	5.21e-12	7.44701e+07
gastropoda	Turbinella	regina	Turbinellidae	extinct	narrow	265.174	0.00124212	0.00142289	0.00296873	1.72e-11	1.59679e+08
gastropoda	Turbo	castanea	Turbinidae	extant	narrow	26.617	1.6005e-05	4.3e-05	7.37e-05	2.65e-13	5.00528e+06
gastropoda	Turritella	acropora	Turritellidae	extant	narrow	60.647	0.000110694	0.000166966	0.000337157	1.57e-12	1.88908e+07
gastropoda	Turritella	alumensis	Turritellidae	extinct	narrow	127.069	0.000265524	0.000374447	0.000953575	3.77e-12	54351040
gastropoda	Turritella	apicalis	Turritellidae	extinct	narrow	40.819	8.35e-05	9.56e-05	0.000199464	1.19e-12	1.07285e+07
gastropoda	Turritella	cookei	Turritellidae	extinct	narrow	49.806	6.97e-05	9.82e-05	0.000250149	9.89e-13	1.42578e+07
gastropoda	Turritella	gladeensis	Turritellidae	extinct	narrow	45.369	6.91e-05	0.000117264	0.000253418	9.81e-13	1.24815e+07
gastropoda	Turritella	magnasulcus	Turritellidae	extinct	narrow	96.782	0.000286539	0.000328239	0.00068484	4.07e-12	3.68354e+07
gastropoda	Turritella	mansfieldi	Turritellidae	extinct	narrow	72.284	0.000134353	0.000228068	0.000492877	1.91e-12	2.42755e+07
gastropoda	Turritella	perattenuata	Turritellidae	extinct	narrow	63.447	0.000142413	0.00017581	0.000348084	2.02e-12	2.01491e+07
gastropoda	Turritella	pontoni	Turritellidae	extinct	narrow	117.631	0.0002694	0.000457315	0.000988304	3.83e-12	4.86765e+07
gastropoda	Turritella	subannulata	Turritellidae	extinct	narrow	7.194	4.01e-06	4.46e-06	1.04e-05	5.69e-14	897914
gastropoda	Turritella	wagneriana	Turritellidae	extinct	narrow	50.156	8.44e-05	0.000127285	0.000257028	1.2e-12	1.44012e+07
gastropoda	Vasum	floridanum	Turbinellidae	extinct	narrow	113.808	0.000256655	0.000327061	0.000784169	3.55e-12	4.77803e+07
gastropoda	Vitricythara	metria	Mangeliidae	extant	narrow	5.99	3.46e-06	4.89e-06	1.24e-05	4.79e-14	709256
gastropoda	Vokesimurex	bellegladeensis	Muricidae	extant	narrow	23.71	1.97e-05	2.52e-05	6.17e-05	3.54e-13	3.89015e+06
gastropoda	Vokesimurex	rubidus	Muricidae	extant	narrow	29.3445	3.1e-05	3.905e-05	8.72845e-05	5.585e-13	5.32342e+06
gastropoda	Xenophora	floridana	Xenophoridae	extinct	narrow	41.9327	6.73667e-05	8.3009e-05	0.000180055	1.06467e-12	1.00692e+07
